# Supplementary material
Source: PubMed Central journal article supplement (PMC4298529)

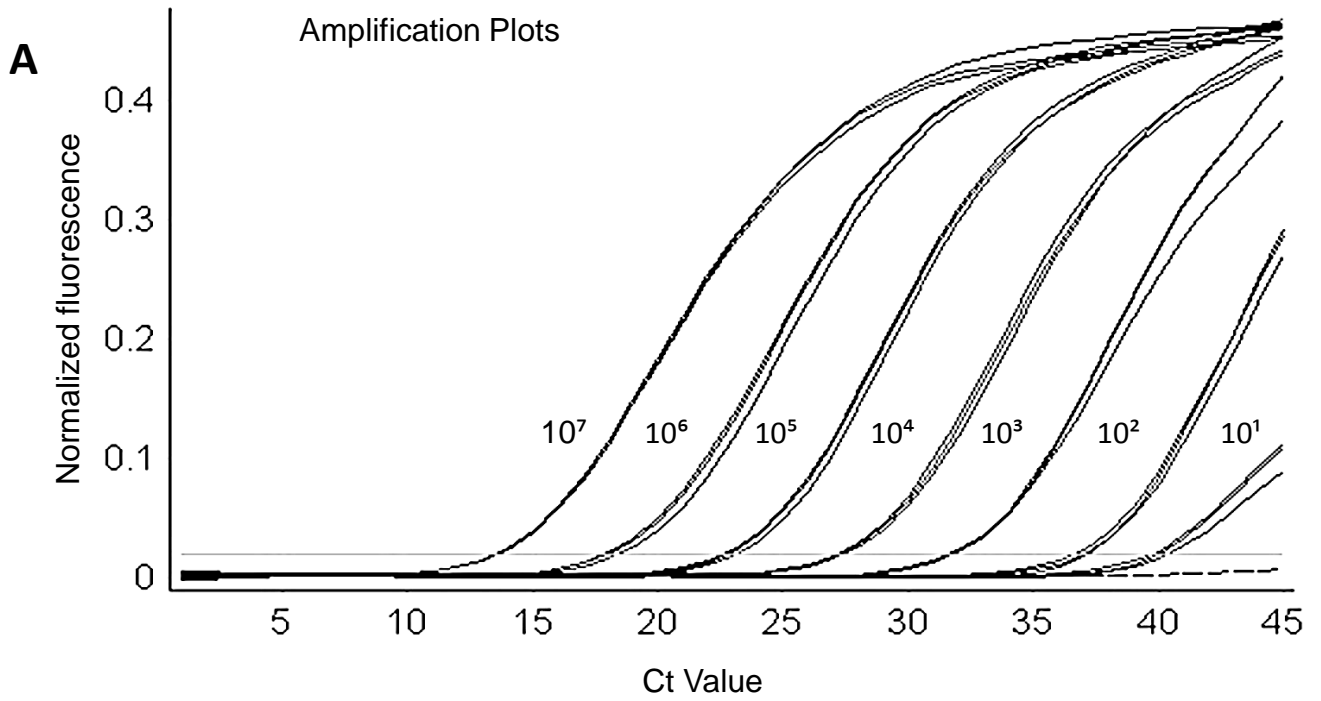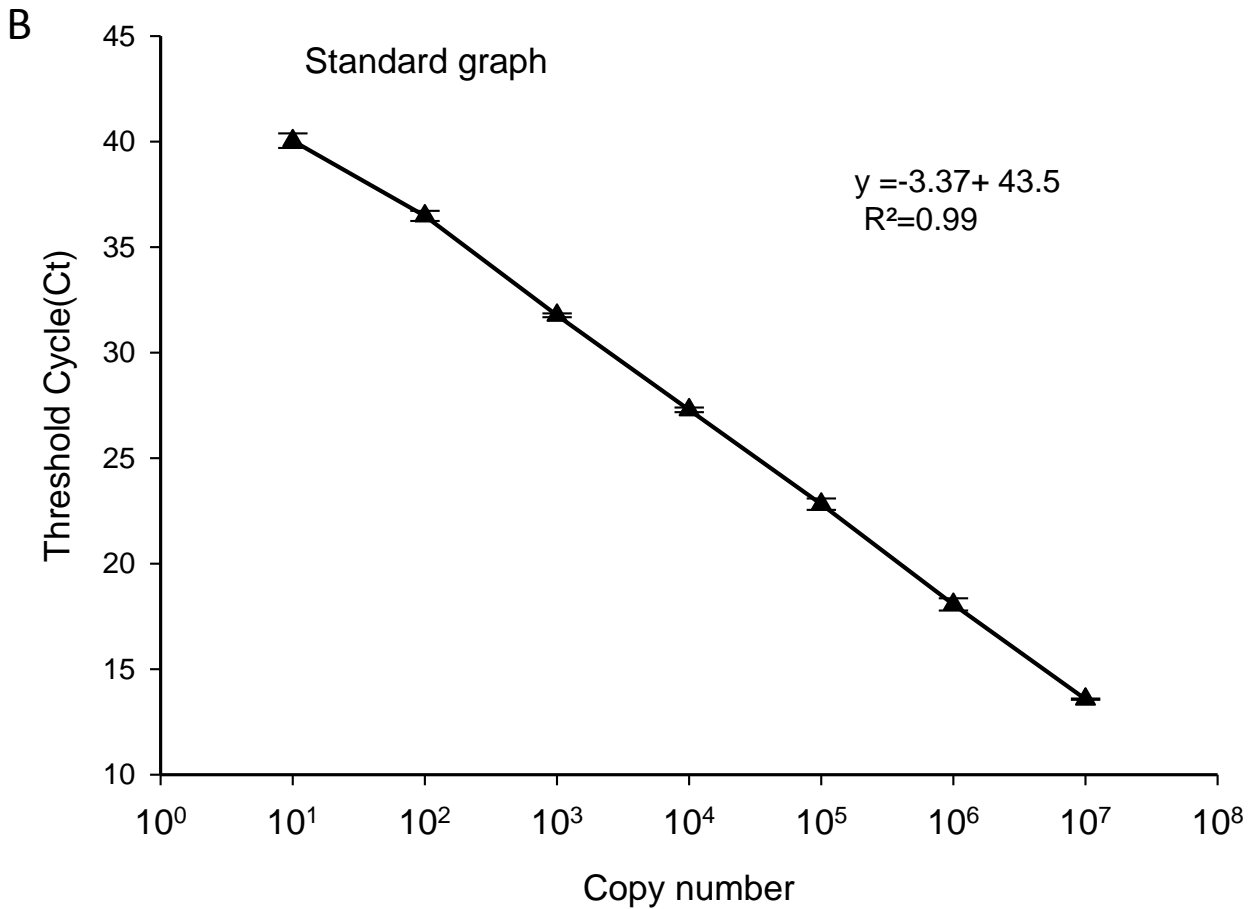

Supplement: JCM.02443-14_zjm002154044so1.pdf [file JCM.02443-14_zjm002154044so1.pdf]
